# Supplementary material for: Supplementation with cyanidin and delphinidin mitigates high fat diet-induced endotoxemia and associated liver inflammation in mice
Source: Royal Society of Chemistry journal article supplement (doi:10.1039/d1fo03108b), 2022-01-01
Supplement: d1fo03108b1.pdf [file d1fo03108b1.pdf]

**Supplemental Table 1**

| <b>Compound</b>           | <b>Content (mg/g of extract)</b> |
|---------------------------|----------------------------------|
| <b>Cyanidin</b>           | 166.4 ± 0.5                      |
| <b>Delphinidin</b>        | 121.7 ± 0.4                      |
| <b>Peonidin</b>           | 16.7 ± 0.1                       |
| <b>Petunidin</b>          | 5.1 ± 0.1                        |
| <b>Malvidin</b>           | 7.6 ± 0.1                        |
| <b>Other anthocyanins</b> | 3.0 ± 0.1                        |
| <b>Total anthocyanins</b> | 320.4 ± 0.7                      |

**Supplemental Table 1. Cyanidin and delphinidin rich extract composition.** Values are means ± SE.
